# Supplementary material for: Forebrain Shh overexpression improves cognitive function and locomotor hyperactivity in an aneuploid mouse model of Down syndrome and its euploid littermates
Source: Acta Neuropathol Commun. 2021 Aug 16;9:137. doi: 10.1186/s40478-021-01237-z (PMC8365939; doi:10.1186/s40478-021-01237-z)
Supplement: Supplementary file 5 — Additional file 5. Table S2 Experimental animal information. [file 40478_2021_1237_MOESM5_ESM.xlsx]

## Sheet: Sheet1
Table S2 Experimental animal information		Additional file 5. Table S2 Experimental animal information.
Figure	Experiment	Breeders	Experimental mice	Background of experimental mice	Age	Gender	Sample size
Figure 1A-C	X-gal staining of Gli1-LacZ mice during postnatal development	B6.Gli1-LacZ (heterozygous) X B6.WT	WT and Gli1-LacZ	B6 congenic	P6, P21, or P90	males and females	n≥3 per group
Figure 1D	X-gal staining of P6 Eu;Gli1-LacZ and Ts65Dn;Gli1-LacZ	B6C3H.Ts65Dn X B6. Gli1-LacZ (heterozygous)	Eu;Gli1-LacZ and Ts65Dn;Gli1-LacZ	B6;C3H(75%;25%)	P6	males	n=3 per group
Figure 1E	Beta-Glo assay of P6 hippocampus and cerebellum of Eu;Gli1-LacZ and Ts65Dn;Gli1-LacZ	B6C3H.Ts65Dn X B6. Gli1-LacZ (heterozygous)	Eu;Gli1-LacZ and Ts65Dn;Gli1-LacZ	B6;C3H(75%;25%)	P6	males	n=4 per group
Figure 2H	X-gal staining of Camk2a-rtTA;TRE-LacZ and TRE-LacZ mice with or without Dox treatment	SJL.TRE-LacZ (homozygous) x B6.Camk2a-rtTA(heterozygous)	TRE-LacZ and Camk2a-rtTA;TRE-LacZ with Dox treatment duration "E0-P30" or "P0-P30" with 5 different doses (1. No Dox, 2. 2mg/ml in drinking water, 3. 3.5 mg/ml in drinking water, 4. 625mg/kg food diets, 5. 3.5 mg/ml in drinking water + 625mg/kg food diets)	SJL;B6(50%;50%)	P30	Both females and males	n≥5 per group
Figure 2I	X-gal staining of Pcp2-rtTA;TRE-LacZ and TRE-LacZ mice with or without Dox treatment	SJL.TRE-LacZ (homozygous) x B6.Pcp2-rtTA(heterozygous)	TRE-LacZ and Camk2a-rtTA;TRE-LacZ with Dox treatment duration "E0-P30" or "P0-P30" with 5 different doses (1. No Dox, 2. 2mg/ml in drinking water, 3. 3.5 mg/ml in drinking water, 4. 625mg/kg food diets, 5. 3.5 mg/ml in drinking water + 625mg/kg food diets)	SJL;B6(50%;50%)	P30	Both females and males	n≥5 per group
Figure 2J	X-gal staining of Camk2a-tTA;TRE-LacZ mice without Dox treatment	SJL.TRE-LacZ (homozygous) x B6.Camk2a-tTA(heterozygous)	TRE-LacZ and Camk2a-rtTA;TRE-LacZ without Dox treatment	SJL;B6(50%;50%)	P30	Both females and males	n≥3 per group
Figure 2K	X-gal staining of Pcp2-tTA;TRE-LacZ and TRE-LacZ mice without Dox treatment	SJL.TRE-LacZ (homozygous) x B6.Pcp2-tTA(heterozygous)	TRE-LacZ and Pcp2-tTA;TRE-LacZ without Dox treatment	SJL;B6(50%;50%)	P30	Both females and males	n≥3 per group
Figure3D-F	Immunostaining analysis of Camk2a-hShh and TRE-hShh mice	B6.Camk2a-tTA (heterozygous) X B6. TRE-hShh (heterozygous) or B6.Camk2a-tTA; TRE-hShh X B6. WT	TRE-hShh and Camk2a-hShh	B6 congenic	2-month-old	Both females and males	n≥3 per group
Figure 3G	FACS of dissociated neurons from cerebral cortex, hippocampus or cerebellum of TRE-hShh and Camk2a-hShh mice	B6.Camk2a-tTA (heterozygous) X B6. TRE-hShh (heterozygous) or B6.Camk2a-tTA; TRE-hShh X B6. WT	TRE-hShh and Camk2a-hShh	B6 congenic	2-month-old	males	N=2 per group
Figure 3H	Taqman RT-PCR of key Shh signaling transcripts in cortex, hippocampus, and cerebellum from TRE-hShh and Camk2a-hShh mice	B6.Camk2a-tTA (heterozygous) X B6. TRE-hShh (heterozygous) or B6.Camk2a-tTA; TRE-hShh X B6. WT	TRE-hShh and Camk2a-hShh	B6 congenic	2-month-old	males	N=5 per group
Figure 4A	X-gal staining of Pcp2-tTA;TRE-LacZ and TRE-LacZ mice during postnatal development	SJL.TRE-LacZ (homozygous) x B6.Pcp2-tTA(heterozygous)	TRE-LacZ and Pcp2-tTA;TRE-LacZ without Dox treatment	SJL;B6(50%;50%)	P0, P6, P14	Both females and males	n≥2 per group
Figure 4B-D	Immunostaining analysis of Pcp2-hShh and TRE-hShh mice	B6.Pcp2-tTA (heterozygous) X B6. TRE-hShh (heterozygous) or B6.Pcp2-tTA; TRE-hShh X B6. WT	TRE-hShh and Pcp2-hShh	B6 congenic	2-month-old	Both females and males	n≥3 per group
Figure 4E	FACS of dissociated neurons from cerebral cortex, hippocampus or cerebellum of TRE-hShh and Pcp2-hShh	B6.Pcp2-tTA (heterozygous) X B6. TRE-hShh (heterozygous) or B6.Pcp2-tTA; TRE-hShh X B6. WT	TRE-hShh and Pcp2-hShh	B6 congenic	2-month-old	males	N=2 per group
Figure 4F	Taqman RT-PCR of key Shh signaling transcripts in cortex, hippocampus, and cerebellum from TRE-hShh and Pcp2-hShh mice	B6.Pcp2-tTA (heterozygous) X B6. TRE-hShh (heterozygous) or B6.Pcp2-tTA; TRE-hShh X B6. WT	TRE-hShh and Pcp2-hShh	B6 congenic	P6, 2-month-old	males	N=5 per group
Figure 4G	X-gal staining of P6 Littermates of TRE-LacZ, Camk2a-tTA;TRE-LacZ, Pcp2-tTA;TRE-LacZ, and Camk2a-tTA;Pcp2-tTA;TRE-LacZ	SJLB6.Pcp2-tTA;TRE-LacZ X SJLB6.Camk2a-tTA or SJLB6.Cam2a-tTA;TRE-LacZ X SJLB6.Pcp2-tTA	TRE-LacZ, Camk2a-tTA;TRE-LacZ, Pcp2-tTA;TRE-LacZ, and Camk2a-tTA;Pcp2-tTA;TRE-LacZ	SJL;B6(50%;50%)	P6	Both females and males	n≥2 per group
Figure 4H	Beta-Glo assay of P6 hippocampus of “TRE-hShh;Gli1-LacZ and Camk2a-hShh;Gli1-LacZ” and P6 cerebellum of “TRE-hShh;Gli1-LacZ and Pcp2-hShh;Gli1-LacZ” .	B6.Cam2a-tTA;TRE-hShh X B6. Gli1-LacZ (heterozygous) B6.Pcp2-tTA;TRE-hShh X B6. Gli1-LacZ (heterozygous)	TRE-hShh;Gli1-LacZ, Camk2a-hShh;Gli1-LacZ, TRE-hShh;Gli1-LacZ, and Pcp2-hShh;Gli1-LacZ	B6 congenic	P6	males	n=5 per group
Figure 5B	Body weight of the forebrain and cerebellum cohort at 3-month-old	B6C3H.Ts65Dn X B6. Camk2a-tTA;TRE-hShh B6C3H.Ts65Dn X B6. Pcp2-tTA;TRE-hShh	The forebrain cohort (Eu;TRE-hShh , Eu;Camk2a-hShh, Ts65Dn;TRE-hShh, and Ts65Dn;Camk2a-hShh), and the cerebellum-cohort (Eu;TRE-hShh , Eu;Pcp2-hShh, Ts65Dn;TRE-hShh, and Ts65Dn;Pcp2-hShh)	B6;C3H(75%;25%)	3-month-old	males	n≥12 per group in The forebrain cohort, n≥14 per group in The forebrain cohort,
Figure 5C-D	Open field tests of the forebrain and cerebellum cohort at 3-month-old	B6C3H.Ts65Dn X B6. Camk2a-tTA;TRE-hShh B6C3H.Ts65Dn X B6. Pcp2-tTA;TRE-hShh	The forebrain cohort (Eu;TRE-hShh , Eu;Camk2a-hShh, Ts65Dn;TRE-hShh, and Ts65Dn;Camk2a-hShh), and the cerebellum-cohort (Eu;TRE-hShh , Eu;Pcp2-hShh, Ts65Dn;TRE-hShh, and Ts65Dn;Pcp2-hShh)	B6;C3H(75%;25%)	3-month-old	males	n≥14 per group in The forebrain cohort, n≥18 per group in The forebrain cohort,
Figure 6	MWM of the forebrain and cerebellum cohort at 3-month-old	B6C3H.Ts65Dn X B6. Camk2a-tTA;TRE-hShh B6C3H.Ts65Dn X B6. Pcp2-tTA;TRE-hShh	The forebrain cohort (Eu;TRE-hShh , Eu;Camk2a-hShh, Ts65Dn;TRE-hShh, and Ts65Dn;Camk2a-hShh), and the cerebellum-cohort (Eu;TRE-hShh , Eu;Pcp2-hShh, Ts65Dn;TRE-hShh, and Ts65Dn;Pcp2-hShh)	B6;C3H(75%;25%)	3-month-old	males	n≥13 per group in The forebrain cohort, n≥18 per group in The forebrain cohort,
Figure 7A-B	RRWM of the forebrain cohort at 3-month-old	B6C3H.Ts65Dn X B6. Camk2a-tTA;TRE-hShh	The forebrain cohort (Eu;TRE-hShh , Eu;Camk2a-hShh, Ts65Dn;TRE-hShh, and Ts65Dn;Camk2a-hShh)	B6;C3H(75%;25%)	3-month-old	males	n≥10 per group
Figure 7C	The forebrain cohort were re-tested in MWM at 7-month-old	B6C3H.Ts65Dn X B6. Camk2a-tTA;TRE-hShh	The forebrain cohort (Eu;TRE-hShh , Eu;Camk2a-hShh, Ts65Dn;TRE-hShh, and Ts65Dn;Camk2a-hShh)	B6;C3H(75%;25%)	7-month-old	males	n≥10 per group
Figure 7D	Survival analysis of the forebrain cohort for 600 days.	B6C3H.Ts65Dn X B6. Camk2a-tTA;TRE-hShh	The forebrain cohort (Eu;TRE-hShh , Eu;Camk2a-hShh, Ts65Dn;TRE-hShh, and Ts65Dn;Camk2a-hShh)	B6;C3H(75%;25%)	up to 600 days old	males	n≥14 per group
Figure 7E-G	MRI of the cerebellum cohort at 14-month-old	B6C3H.Ts65Dn X B6. Pcp2-tTA;TRE-hShh	The cerebellum-cohort (Eu;TRE-hShh , Eu;Pcp2-hShh, Ts65Dn;TRE-hShh, and Ts65Dn;Pcp2-hShh)	B6;C3H(75%;25%)	14-month-old	males	n=8 per group
