# Supplementary material for: Forebrain Shh overexpression improves cognitive function and locomotor hyperactivity in an aneuploid mouse model of Down syndrome and its euploid littermates
Source: Acta Neuropathol Commun. 2021 Aug 16;9:137. doi: 10.1186/s40478-021-01237-z (PMC8365939; doi:10.1186/s40478-021-01237-z)
Supplement: Supplementary file 10 — Additional file 10. Table S7 RT-PCR of MEF cells with no plasmid transfection, CMV-rtTA and TRE-hShh transfection (-DOX), and CMV-rtTA and TRE-hShh transfection (+DOX). [file 40478_2021_1237_MOESM10_ESM.xlsx]

## Sheet: Sheet2
Additional file 10. Table S7 RT-PCR of MEF cells with no plasmid transfection, CMV-rtTA and TRE-hShh transfection (-DOX), and CMV-rtTA and TRE-hShh transfection (+DOX).
Sample Name		Target Name	Relative human Shh expression	Cт	Cт Mean	Cт SD	ΔCт Mean	ΔCт SE	ΔΔCт
No transfection	1	human SHH		Undetermined (>40)
No transfection	2	human SHH		Undetermined (>40)
No transfection	3	human SHH		Undetermined (>40)
CMV-rtTA and TRE-hShh (-Dox)	Sample 1 (repeat 1)	human SHH	1	32.7482	33.105	0.686556	11.6153	0.400222	0
CMV-rtTA and TRE-hShh (-Dox)	Sample 1 (repeat 2)	human SHH	1	32.6703	33.105	0.686556	11.6153	0.400222	0
CMV-rtTA and TRE-hShh (-Dox)	Sample 1 (repeat 3)	human SHH	1	33.8965	33.105	0.686556	11.6153	0.400222	0
CMV-rtTA and TRE-hShh (-Dox)	Sample 2 (repeat 1)	human SHH	1.27947	32.2702	32.1762	0.0941871	11.2597	0.109651	-0.355545
CMV-rtTA and TRE-hShh (-Dox)	Sample 2 (repeat 2)	human SHH	1.27947	32.0819	32.1762	0.0941871	11.2597	0.109651	-0.355545
CMV-rtTA and TRE-hShh (-Dox)	Sample 2 (repeat 3)	human SHH	1.27947	32.1765	32.1762	0.0941871	11.2597	0.109651	-0.355545
CMV-rtTA and TRE-hShh (-Dox)	Sample 3 (repeat 1)	human SHH	0.877572	32.3852	32.7926	0.449127	11.8037	0.259912	0.188411
CMV-rtTA and TRE-hShh (-Dox)	Sample 3 (repeat 2)	human SHH	0.877572	32.7184	32.7926	0.449127	11.8037	0.259912	0.188411
CMV-rtTA and TRE-hShh (-Dox)	Sample 3 (repeat 3)	human SHH	0.877572	33.2742	32.7926	0.449127	11.8037	0.259912	0.188411
CMV-rtTA and TRE-hShh (+Dox)	Sample 1 (repeat 1)	human SHH	107.121	25.6101	25.6068	0.00929003	4.87219	0.100551	-6.7431
CMV-rtTA and TRE-hShh (+Dox)	Sample 1 (repeat 2)	human SHH	107.121	25.5963	25.6068	0.00929003	4.87219	0.100551	-6.7431
CMV-rtTA and TRE-hShh (+Dox)	Sample 1 (repeat 3)	human SHH	107.121	25.614	25.6068	0.00929003	4.87219	0.100551	-6.7431
CMV-rtTA and TRE-hShh (+Dox)	Sample 2 (repeat 1)	human SHH	81.4452	26.1324	26.1503	0.138815	5.26753	0.102492	-6.34776
CMV-rtTA and TRE-hShh (+Dox)	Sample 2 (repeat 2)	human SHH	81.4452	26.0213	26.1503	0.138815	5.26753	0.102492	-6.34776
CMV-rtTA and TRE-hShh (+Dox)	Sample 2 (repeat 3)	human SHH	81.4452	26.2972	26.1503	0.138815	5.26753	0.102492	-6.34776
CMV-rtTA and TRE-hShh (+Dox)	Sample 3 (repeat 1)	human SHH	116.268	25.9678	26.0197	0.0451808	4.75398	0.0399077	-6.86131
CMV-rtTA and TRE-hShh (+Dox)	Sample 3 (repeat 2)	human SHH	116.268	26.0403	26.0197	0.0451808	4.75398	0.0399077	-6.86131
CMV-rtTA and TRE-hShh (+Dox)	Sample 3 (repeat 3)	human SHH	116.268	26.0508	26.0197	0.0451808	4.75398	0.0399077	-6.86131
No transfection	1	mouse ACTIN		23.4329
No transfection	2	mouse ACTIN		23.6501
No transfection	3	mouse ACTIN		23.7497
CMV-rtTA and TRE-hShh (-Dox)	Sample 1 (repeat 1)	mouse ACTIN		21.52	21.4897	0.0957833
CMV-rtTA and TRE-hShh (-Dox)	Sample 1 (repeat 2)	mouse ACTIN		21.3825	21.4897	0.0957833
CMV-rtTA and TRE-hShh (-Dox)	Sample 1 (repeat 3)	mouse ACTIN		21.5667	21.4897	0.0957833
CMV-rtTA and TRE-hShh (-Dox)	Sample 2 (repeat 1)	mouse ACTIN		20.7367	20.9165	0.16492
CMV-rtTA and TRE-hShh (-Dox)	Sample 2 (repeat 2)	mouse ACTIN		21.0607	20.9165	0.16492
CMV-rtTA and TRE-hShh (-Dox)	Sample 2 (repeat 3)	mouse ACTIN		20.9519	20.9165	0.16492
CMV-rtTA and TRE-hShh (-Dox)	Sample 3 (repeat 1)	mouse ACTIN		21.0069	20.9889	0.0307932
CMV-rtTA and TRE-hShh (-Dox)	Sample 3 (repeat 2)	mouse ACTIN		21.0064	20.9889	0.0307932
CMV-rtTA and TRE-hShh (-Dox)	Sample 3 (repeat 3)	mouse ACTIN		20.9533	20.9889	0.0307932
CMV-rtTA and TRE-hShh (+Dox)	Sample 1 (repeat 1)	mouse ACTIN		20.655	20.7346	0.173912
CMV-rtTA and TRE-hShh (+Dox)	Sample 1 (repeat 2)	mouse ACTIN		20.6147	20.7346	0.173912
CMV-rtTA and TRE-hShh (+Dox)	Sample 1 (repeat 3)	mouse ACTIN		20.9341	20.7346	0.173912
CMV-rtTA and TRE-hShh (+Dox)	Sample 2 (repeat 1)	mouse ACTIN		20.7551	20.8828	0.110653
CMV-rtTA and TRE-hShh (+Dox)	Sample 2 (repeat 2)	mouse ACTIN		20.9433	20.8828	0.110653
CMV-rtTA and TRE-hShh (+Dox)	Sample 2 (repeat 3)	mouse ACTIN		20.9499	20.8828	0.110653
CMV-rtTA and TRE-hShh (+Dox)	Sample 3 (repeat 1)	mouse ACTIN		21.206	21.2657	0.0523122
CMV-rtTA and TRE-hShh (+Dox)	Sample 3 (repeat 2)	mouse ACTIN		21.2873	21.2657	0.0523122
CMV-rtTA and TRE-hShh (+Dox)	Sample 3 (repeat 3)	mouse ACTIN		21.3037	21.2657	0.0523122
